# Supplementary material
Source: Springer Nature journal article supplement (https://www.springermedizin.de/resource/supplementary/13012_2011_579_MOESM8_ESM.pdf/9630020)
Supplement: MOESM8 [file 9630020]

## Domain: Organizational context

### Constructs

#### Capability

←category

Collective efficacy, skills, competency ←category

- for using CQI methods & tools
- for change or improvement

#### Capability development

←category

- history of using CQI methods or change
- training in CQI principles, methods, tools
- training & development (not QI specific)
- capacity for learning, knowledge sharing

*Domain* refers to the broad categories depicted in the framework (CQI use and implementation, organizational context, individual factors). Instrument content is categorised under these domains, and the domain names are used throughout the review.

*Constructs* are the factors included in each domain. More specifically, *constructs* are the concept(s) or characteristic(s) that an instrument is designed to measure. An instrument might be designed to measure a broad construct (*e.g.*, capability development) or a narrower construct (*e.g.*, history of using CQI methods).

*Category* is a general term we use to refer to any grouping of related constructs, irrespective of level.
